# THE ROLE OF CAULOBACTER CELL SURFACE STRUCTURES IN COLONIZATION OF THE AIR-LIQUID INTERFACE

ARETHA FIEBIG

Department of Biochemistry and Molecular Biology, The University of Chicago, Chicago, IL  
amfiebig@uchicago.edu

## Abstract

In aquatic environments, *Caulobacter* spp. are often present at the boundary between liquid and air known as the neuston. I report an approach to study temporal features of *Caulobacter crescentus* colonization and pellicle biofilm development at the air-liquid interface, and have defined the role of cell surface structures in this process. The flagellum enables motile swarmer cells to efficiently reach the oxygenated surface. Here, cells form a monolayer enriched in stalked cells bearing a surface adhesin known as a holdfast. When excised from the liquid surface, this monolayer strongly adheres to glass. The monolayer subsequently develops into a three-dimensional structure that is highly enriched in clusters of stalked cells known as rosettes. As the pellicle film matures, it becomes more cohesive and less adherent to a glass surface. A mutant strain lacking a flagellum does not efficiently reach the surface, and strains lacking type IV pili exhibit defects in organization of the three-dimensional pellicle. Strains unable to synthesize holdfast fail to accumulate at the air-liquid interface and do not form a pellicle. Phase contrast images support a model whereby the holdfast functions to trap *C. crescentus* cells at the air-liquid boundary. Unlike the holdfast, neither the flagellum nor pili are required for *C. crescentus* to partition to the air-liquid interface. While it is well established that the holdfast enables adherence to solid surfaces, this study provides evidence that the holdfast has physicochemical properties that enable partitioning of non-motile mother cells to the air-liquid interface, which facilitates colonization of this microenvironment.

## Importance

In aquatic environments the boundary at the air interface is often highly enriched with nutrients and oxygen. The ability of microbial cells to colonize this niche likely confers a significant fitness advantage in many cases. This study provides evidence that the cell surface adhesin known as a holdfast enables *Caulobacter crescentus* to partition to and colonize the air-liquid interface. Additional surface structures including the flagellum and pili are important determinants of colonization and biofilm formation at this boundary. Considering that holdfast-like adhesins are broadly conserved in *Caulobacter* spp. and other members of the diverse class *Alphaproteobacteria*, these surface structures may function broadly to facilitate colonization of air-liquid boundaries in a range of ecological contexts including freshwater, marine, and soil ecosystems.

## Introduction

In aqueous systems, macronutrients partition to and accumulate at surfaces at both solid-liquid and air-liquid boundaries (1, 2), and dissolved oxygen levels are highest at air

interfaces. An ability to take advantage of elevated concentrations of nutrients and/or oxygen at such surface boundaries likely confers a significant growth advantage in many cases (3). Certainly, bacteria have long been noted to

## Determinants of *Caulobacter* pellicle development

partition to submerged solid-surfaces (4, 5) and to air-liquid interfaces (6). Diverse morphological and metabolic characteristics of bacterial cells enable colonization of surface microenvironments.

As aquatic systems cover the majority of our planet, microbial activity in surface films has a significant impact on global biogeochemical cycles (7-10). Moreover, ecologically important aqueous interfaces are also found in terrestrial soils, where microbes primarily occupy the aqueous phase at solid- and air-liquid boundaries (10, 11). In porous soils and highly aerated bodies of water, bubbles provide mobile air-liquid surfaces upon which bacteria can be transported (10, 11). Though biofilms at air-liquid interfaces are not as well studied as solid surfaces common themes in biofilm development in many species on varied surfaces have emerged over the past two decades. For example, flagellar motility and extracellular polysaccharides are important for colonization of both solid surfaces and air-liquid interfaces. In many cases, protein polymers such as pili and curli, or extracellular DNA also play a role in surface attachment and/or biofilm development (for reviews see (12-17)).

### *A dimorphic bacterial model to study colonization of the air-liquid interface*

*Caulobacter* spp. are found in nearly any environment that experiences extended periods of moisture including marine, freshwater, and soil ecosystems (18, 19). Poindexter previously reported an approach to enrich *Caulobacter* spp. by sampling from the air-liquid interface (20). Specifically, she noted that when natural water samples are left to stand, a pellicle enriched with prosthecate (i.e. stalked) bacteria will form at the surface where the liquid meets the air. *Caulobacter* have a dimorphic life cycle

characteristic of many *Alphaproteobacteria* whereby each cell division yields a motile newborn swarmer cell and a sessile mother cell (20-22). In the case of *Caulobacter*, the sessile mother cell has a polar prosthecum, or stalk, while the swarmer cell has a single flagellum and multiple type IV pili at one cell pole. The swarmer cell further has the capacity to secrete a polar adhesin, called a holdfast, at its flagellated/piliated pole (23-25). Cells are motile for only a fraction of the cell cycle; swimmers transition to sessile stalked cells upon initiation of DNA replication and thus undergo a transition from motile to sessile with every round of cell division.

As a swarmer cell transitions to a stalked cell, the flagellum is shed, and the pili are retracted, but the holdfast remains on the old pole from which the stalk emerges. In *Caulobacter crescentus*, the flagellum and pili are important for initial surface attachment while the holdfast is required for permanent attachment to a range solid surfaces including glass, mica, plastics, and decaying biotic material (23, 26). In fact, robust surface attachment via the holdfast adhesin is the characteristic that initially led to the isolation of *Caulobacter* species (27, 28). The holdfast also mediates polar cell-cell attachments resulting in the generation of multicellular structures, often called rosettes.

While the chemical composition of the holdfast material is not well understood, the genes required for its synthesis indicate it is a polysaccharide (29, 30) that likely contains four distinct sugars (31). Lectin staining and enzymatic digestion studies indicate N-acetylglucosamine moieties are present in the holdfast (32), and there is also evidence that protein and DNA are important components of this adhesin (33). The role of the *C. crescentus*

## Determinants of *Caulobacter* pellicle development

holdfast and other surface structures, including the flagellum and type IV pili, in colonization of the air-liquid interface has not been investigated.

In this study, I describe the process by which *C. crescentus* colonizes the air-liquid interface under static growth conditions, and define molecular determinants of this colonization process. Initially, cells accumulate in an evenly dispersed monolayer at the air-liquid interface. At sufficiently high density, the monolayer transitions to a dense multilayered pellicle structure composed primarily of large connected rosette aggregates. Polar cell surface appendages including the flagellum, type IV pili and the holdfast all contribute to the development of this *C. crescentus* pellicle. As in biofilm formation on solid substrates, the flagellum and pili are important for efficient pellicle biofilm development, though neither is strictly required. Holdfast biosynthesis, on the other hand, is absolutely required for *C. crescentus* cells to accumulate at the air-liquid boundary and to form a pellicle. This work establishes a critical ecological role for the holdfast adhesin, namely in partitioning to the air-liquid interface. Moreover, this work establishes the pellicle as a new system to study biofilm development in *C. crescentus* that is complementary to biofilm studies on solid surfaces.

## Results

### *C. crescentus* develops a pellicle under static growth conditions

To measure attachment to solid surfaces, bacteria are typically grown in polystyrene microtiter dishes or glass culture tubes and surface attached bacteria are detected by staining with crystal violet. When grown in static

culture (i.e. without shaking), *C. crescentus* cells accumulate in high numbers on glass or polystyrene near the air-liquid interface (see Figure 1b, bottom panel). This could reflect a bias in surface colonization at the boundary where the solid surface, culture medium, and air meet. Indeed, bacteria at this interface are reported to undergo rapid, irreversible attachment to solid surfaces at a level that is higher than cells in the bulk (10). However, it may also be the case that the enrichment of *C. crescentus* cells at the solid-liquid-air boundary simply reflects biased colonization of the entire air-liquid interface at the surface of the growth medium.

To visualize and monitor colonization of the air-liquid interface, I grew wild type *C. crescentus* strain CB15 in large volumes of a peptone-yeast extract (PYE) broth under static conditions. As culture density increased, cells formed a surface film, or pellicle, that evenly covered the entire air-liquid interface (Figure 1a). Growth was required for pellicle formation: cultures grown to stationary phase in a roller or shaker did not form pellicles when transferred to static conditions unless diluted with fresh growth medium (Figure 1b). Static growth was accompanied by the establishment of a steep oxygen gradient in the culture flask. Dissolved oxygen levels were saturated in inoculated growth medium, but measurable only in the first 2-3 mm from the air-liquid interface in medium inoculated with cells. This was true for both strains that develop pellicles (i.e. CB15) and strains that do not (i.e. NA1000) (Figure 1c).

Biofilm development on solid surfaces is a well developed area of study in part due to the development of robust methods to visualize live cells attached to glass slides in flow chambers (34) and to quantify cells attached to surfaces by crystal violet staining (35). Neither

## Determinants of *Caulobacter* pellicle development

of these techniques is directly applicable to the study of biofilm pellicle development at the air-liquid interface. As such, I developed a method to image *C. crescentus* cells from the pellicle.

An intact plug of the pellicle could be captured by using the large end of a 1 ml pipet tip

(Figure 1d). This plug could be transferred to a glass slide and a) covered with a coverslip for visualization by light microscopy, or b) allowed to adhere to the glass slide and stained with crystal violet (Figure 2). I used these techniques to monitor pellicle development in static

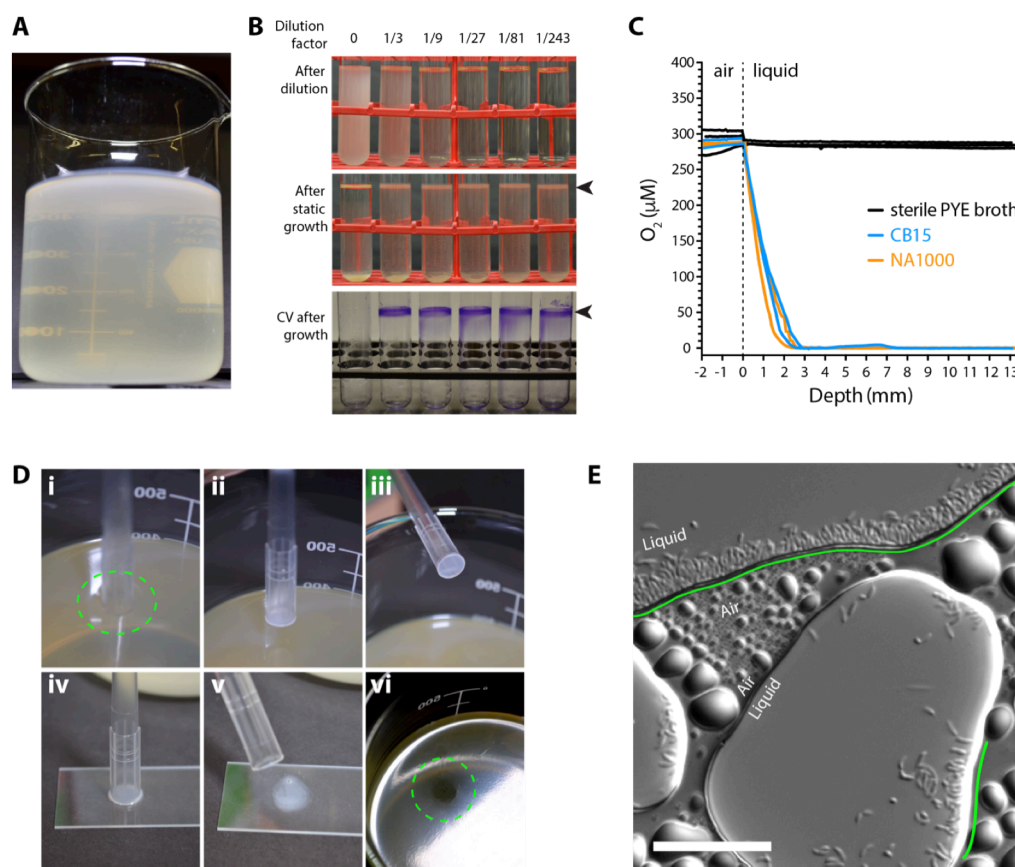

**Figure 1: *Caulobacter crescentus* strain CB15 develops a pellicle at the air-liquid interface during static growth**

**A.** Wild-type *C. crescentus* CB15 culture grown at room temperature without mixing (i.e. static growth) for three days. Note the accumulation of cells in a pellicle at the air-liquid interface at the top of the beaker. **B.** Pellicle development requires growth. *Top:* A culture was grown to stationary phase under aerated conditions, transferred to a fresh tube (far left) and serially diluted with fresh medium (towards the right; dilution fractions shown above each tube). *Middle:* The same tubes are shown after incubation on the benchtop for 4 days. Arrow highlights colonization of the air-liquid interface in diluted cultures, which grew post-dilution, but not in the undiluted culture. *Bottom:* Crystal violet (CV) stain of attached cells in tubes after cultures were washed away. The arrow highlights the position of the air-liquid interface. **C.** Oxygen gradient is steep at the surface of unmixed cultures. Oxygen concentration as a function of depth from the surface (0 mm) was measured in tubes with PYE were left sterile (black traces), or inoculated with wild type *C. crescentus* strain CB15 (blue traces) or strain NA1000 (orange traces) and incubated without mixing. CB15 cells accumulate at the air-liquid interface, while NA1000 cells are evenly dispersed throughout the culture. Both genotypes yield comparable oxygen gradients. Each trace represents an independent culture (n=2). Limit of detection is 0.3  $\mu M$ . **D.** Method for sampling the pellicle. Large end of a sterile pipet tip is touched on the pellicle surface (i), lifted (ii, iii) and placed on a glass slide (iv, v). A pellicle scar (vi, green circle) can be seen after the plug removed from this 72-hour culture. **E.** Differential interference contrast image of bubbles formed during slide preparation. *C. crescentus* cells align perpendicular to the air-liquid interfaces (see boundaries highlighted by green lines). Scale bar is 20  $\mu m$ .



# Determinants of *Caulobacter* pellicle development

cultures starting at low-density ( $OD_{660} \approx 0.005$ ). Phase contrast imaging of plugs from the air-liquid interface revealed a rapid accumulation of cells at this boundary (Figure 2).

Cells formed an evenly dispersed monolayer by 8 hours post inoculation. Through time, monolayer density increased and eventually formed a cohesive network of cells. By 24 hours post inoculation, the surface monolayer had few, if any, gaps between cells and was sufficiently dense to be visible by eye. In the monolayer stage, *C. crescentus* cells in plugs readily adsorbed to a glass surface and could be stained by crystal violet (Figure 2). These plugs had well-formed edges and increased crystal violet staining of plugs was coincident with increased density of the monolayer. The void left by removing a plug from the surface film was rapidly filled by the surrounding film at this stage, suggesting that an early stage pellicle has fluid-like properties.

Between 24 and 48 hours, a transition occurred from a monolayer to a multilayered structure that contained dense rosettes (Figure 2). Simultaneously, the plug became stiffer and more cohesive. Removal of a plug from the pellicle at this stage left a visible scar that was not filled by surrounding cells (Figure 1d). Upon this transition to a multilayered rosetted structure, pellicle plugs no longer adhered to a glass slide. Instead, the plugs crumbled and washed away during staining. These thick multilayered pellicle structures were challenging to image by light microscopy. When flattened by the coverslip, the

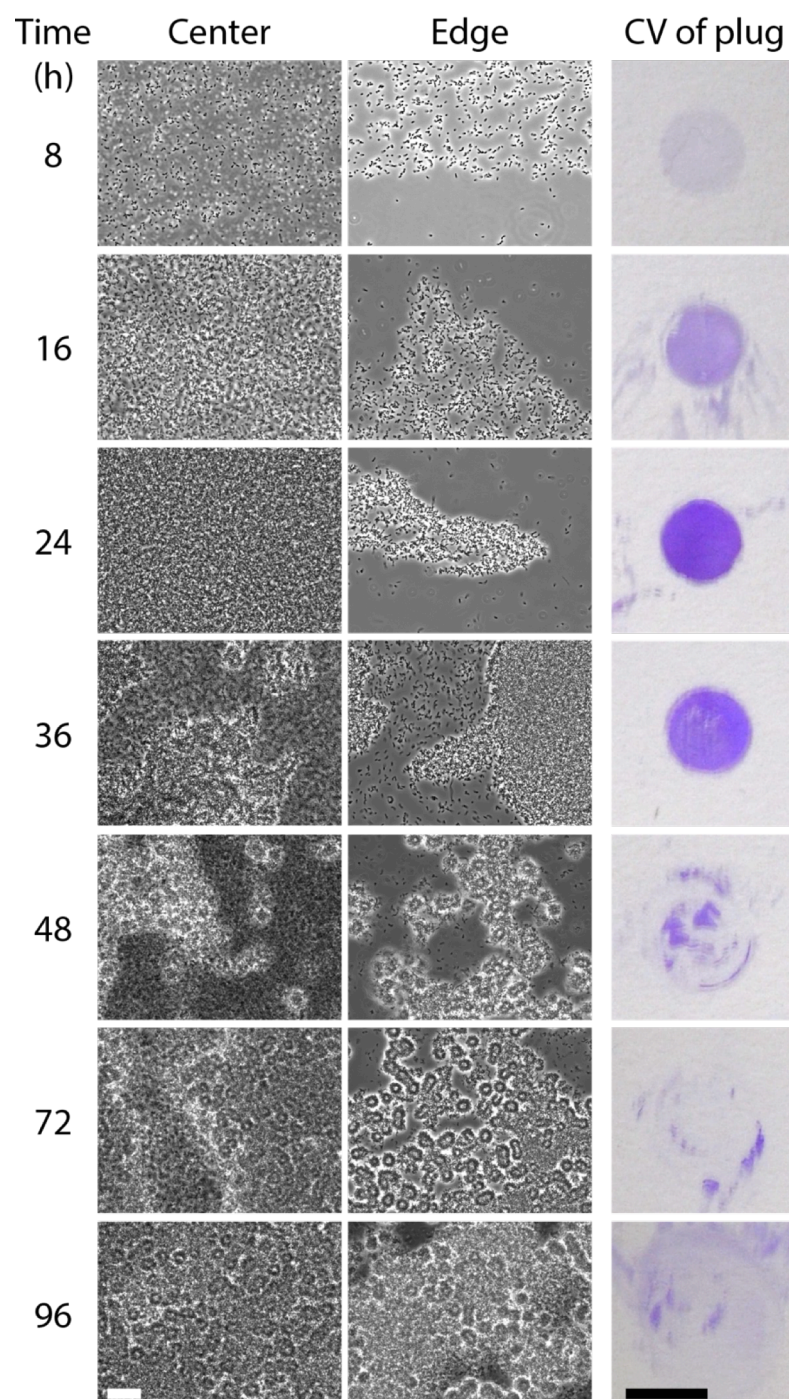

**Figure 2: The pellicle develops from a homogeneous monolayer into a multilayered structure of dense rosettes**

Surface plugs from a wild-type culture sampled periodically throughout static growth (time in hours after inoculation on the left) evaluated by phase contrast microscopy (left) and crystal violet staining (right). Two microscopy images are presented at each time point to capture the structure of cells in the center of the plug (left column) and also at the edges of the plug (right column; 8-36 hour samples) or cells disrupted from the multilayered plug structure (right column; 48-96 hour samples). White scale bar is 20  $\mu$ m. Black scale bar is 1 cm. This time course was repeated more than 3 times.



## Determinants of *Caulobacter* pellicle development

structures were compressed and/or dispersed; when less flattened by the coverslip, the structures appeared glassy under phase contrast. In either case, it is clear that the mature pellicle consists of a dense network of connected rosettes. Between 48 and 96 hours, the pellicle became even thicker and more visible macroscopically and microscopically. At some point after 96 hours, pellicles typically crashed sinking under their own weight and settled in fragments at the bottom of the culture container.

### *Holdfast are prominent in the pellicle*

Many *Alphaproteobacteria*, including *C. crescentus*, form multicellular rosettes by adhering to each other through the polar polysaccharide, or holdfast. Given the notable presence of rosettes in the pellicle, I sought to directly visualize the holdfast in the pellicle using fluorescent wheat germ agglutinin (fWGA), a lectin that binds to N-acetylglucosamine moieties in the holdfast polysaccharide. Typical holdfast staining protocols using fWGA involve pelleting and washing the cells. To minimize disruptions to the pellicle structure during staining, I supplemented the medium with fWGA at the time of inoculation rather than staining after the pellicle was formed.

In the early monolayer stages, nearly every cell was decorated with a holdfast at one cell pole (Figure 3). Fluorescent puncta corresponding to holdfast merged as the monolayer increased in density. As the

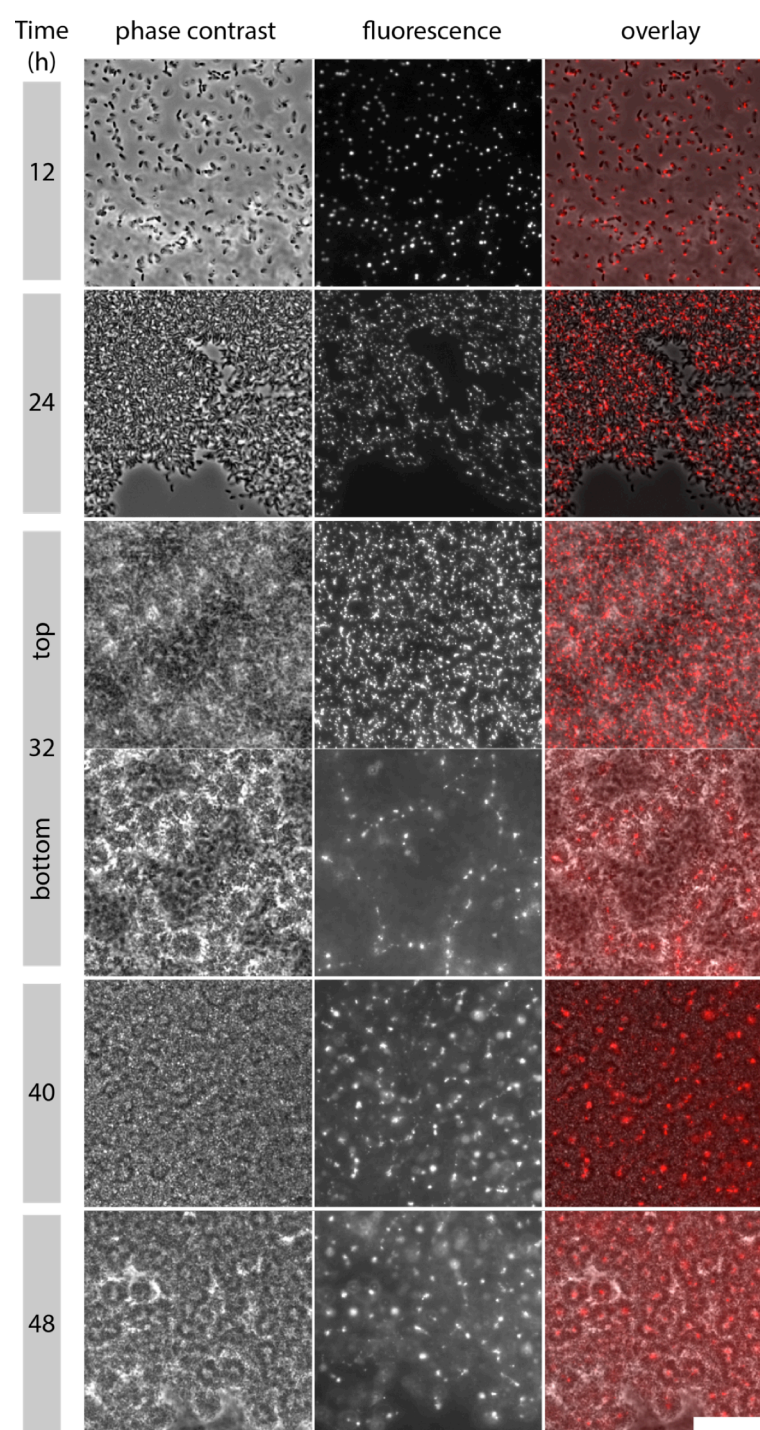

**Figure 3: *In situ* fWGA staining of pellicle samples**

Phase contrast and fluorescence images of cells grown in the presence of fWGA sampled at time intervals after inoculation. During the transition from monolayer to multilayered structure, at 32-hours, two focal planes of the same position in the pellicle plug are shown. These correspond to the uppermost plane where fWGA puncta from individual cells are in focus, and the bottom plane just below the monolayer where the centers of rosettes are in focus. At 40 and 48 hours, focal planes from the middle of the film are shown. Scale bar is 20  $\mu\text{m}$ . This time course was repeated twice.

## Determinants of *Caulobacter* pellicle development

multilayered structure emerged (32 hrs) distinct patterns of holdfast staining were evident in different layers. Focusing on the top layer revealed of a dense array of holdfast puncta similar to that observed in the monolayer at 24 hours. Lower layers of the plug consisted of strings of rosettes, which often appeared to be connected by threads. As the pellicle matured, the lower layers became packed with rosettes whose cores stained prominently with fWGA. The cores of adjacent rosettes were connected in n three dimensions in a manner that likely

confers strength to the pellicle biofilm.

In fragments of dispersed pellicle film, the spatial relationship between stained holdfast and the connected rosettes was more easily visualized (Figure 4). Several types of structures are apparent. The tight focus of fWGA seen in radially symmetric rosettes is consistent with holdfast adhered to each other at a single point. The cores of oblong rosettes are filled with many bright fWGA puncta and also a more diffuse fluorescent signal. This pattern suggests the rosette center is filled with

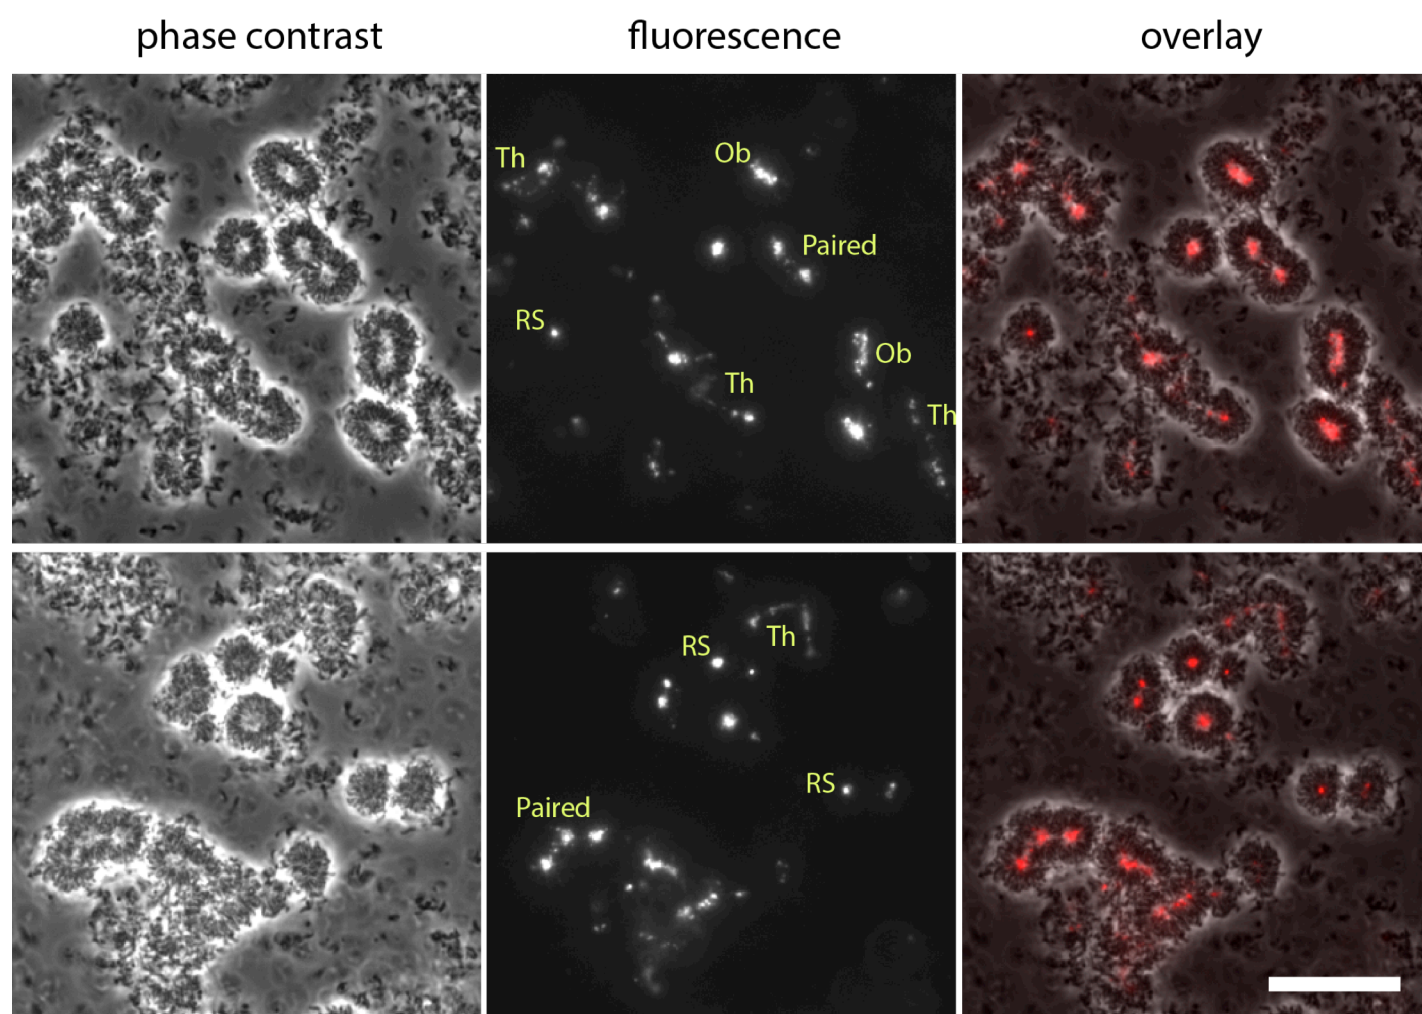

**Figure 4: fWGA stained rosette structures**

Two fields of view of rosette aggregates from a disrupted pellicle at 72 hours post inoculation are shown as in Figure 3. Multiple structure types are highlighted: radially symmetric (RS) rosettes with a tight fWGA focus; Oblong (Ob) rosettes with fWGA filled core and bright puncta throughout the core; adjointed rosettes (Paired) with several puncta between the rosette cores; and threads (Th) with adhered holdfast that connect rosette cores or support extended rosette-like structures. Scale bar is 10  $\mu$ m.



## Determinants of *Caulobacter* pellicle development

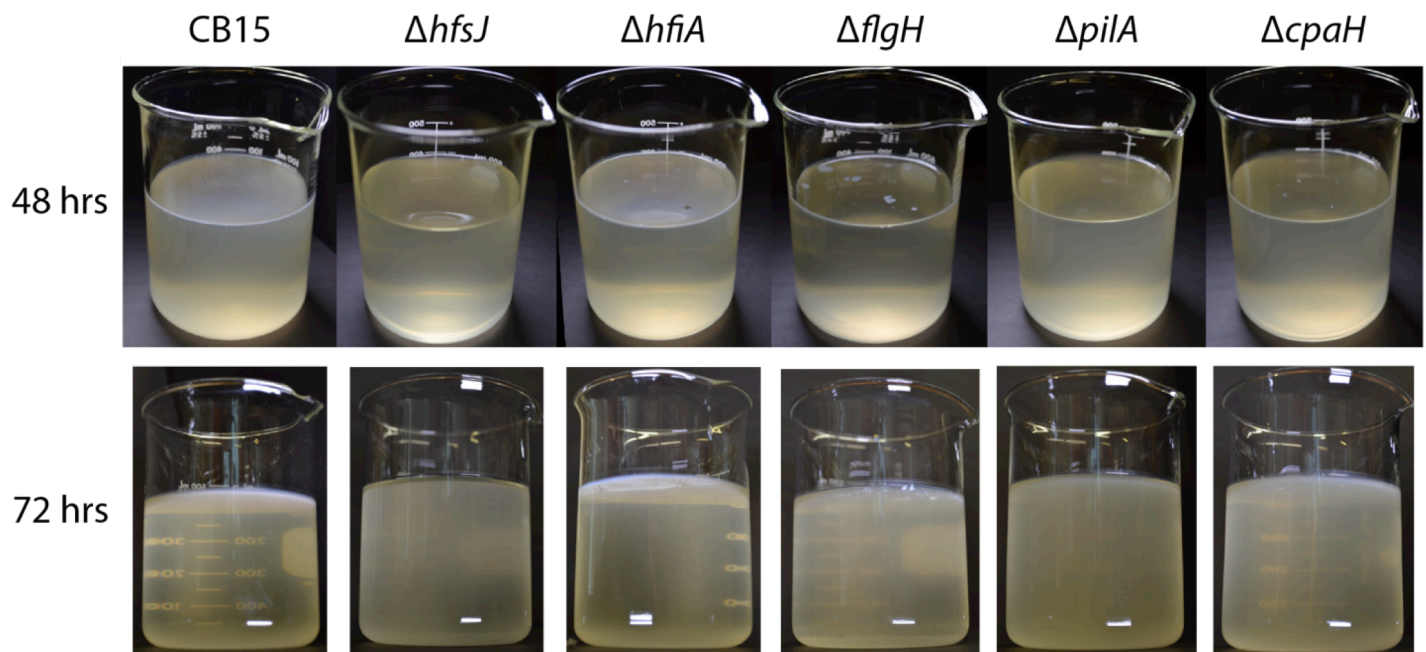

**Figure 5: Macroscopic pellicles of polar appendage mutants**

Static cultures of wild-type and mutant ( $\Delta$ ) strains 48 and 72 hours after inoculation imaged from above or below respectively. See text for details on mutants. This experiment was repeated more than three times. A representative experiment is shown.

holdfast material. The cores of each holdfast in these rosettes do not bind a singular central focus, but rather adhere in a mesh-like array. The strings of cells, inferred by the linear pattern of fluorescent holdfast puncta (Figures 3 and 4), provide evidence that holdfast can adhere to and decorate an unknown fiber in the pellicle.

### *Holdfast biosynthesis is required for pellicle formation*

The observation of networks of rosettes in the pellicle led me to ask if the holdfast is necessary for pellicle formation. Strains lacking *hfsJ*, a gene required for holdfast synthesis (36), do not form macroscopically visible pellicles (Figure 5). Not surprisingly, cells in plugs from  $\Delta hfsJ$  cultures do not attach to glass slides as evidenced by the lack of crystal violet staining (Figure 6). At a microscopic scale,  $\Delta hfsJ$  cells reach the surface microlayer as motile swarmer cells, but stalked and pre-divisional cells do not

accumulate at the air-liquid interface (Figure 7). I obtained similar results for strains bearing an either an in-frame deletion or a frameshift mutation in the *hfsA* holdfast synthesis gene (data not shown).

Holdfast biosynthesis is elevated in cells lacking *hfiA*, a negative regulator of holdfast biosynthesis (36). Pellicle development is accelerated in a  $\Delta hfiA$  strain; these pellicles appear macroscopically thicker and leave plug scars at an earlier stage than wild type (Figure 5). Microscopically, the monolayer stage is similar to wild type (Figure 7), but the transition to a multilayered rosetted structure is more rapid, and the plugs lose adherence to glass sooner (Figure 6). Together these results indicate that holdfast is essential for cells to accumulate at the air-liquid interface and for the development of the pellicle structure. Enhancement of holdfast synthesis by deletion of *hfiA* promotes a thicker, more rigid pellicle.

## Determinants of *Caulobacter* pellicle development

### Flagella and pili determine efficient pellicle development.

Flagella and pili are important factors for colonization of solid surfaces in *C. crescentus* (23, 26) and other species (37-39). Recently published data provide support for complex interplay between the flagellum, type IV pili and control of holdfast development in *C. crescentus* (25, 31, 40-42). Given the clear role of the pilus and flagellum in attachment to solid surfaces, and the regulatory connection between these structures and holdfast development, I tested the contribution of these

appendages to *C. crescentus* pellicle development at the air-liquid interface. Specifically, I characterized pellicle development in a non-motile strain lacking *flgH*, the outer membrane ring component of the flagellum. In addition, I assessed the role of the pilus in pellicle development using a mutant lacking *pilA*, which encodes the pilus filament protein, and a mutant lacking *cpaH*, which encodes a transmembrane component required for type IV pilus assembly.

Non-motile  $\Delta flgH$  cells had dramatically delayed pellicle development. The pellicle that

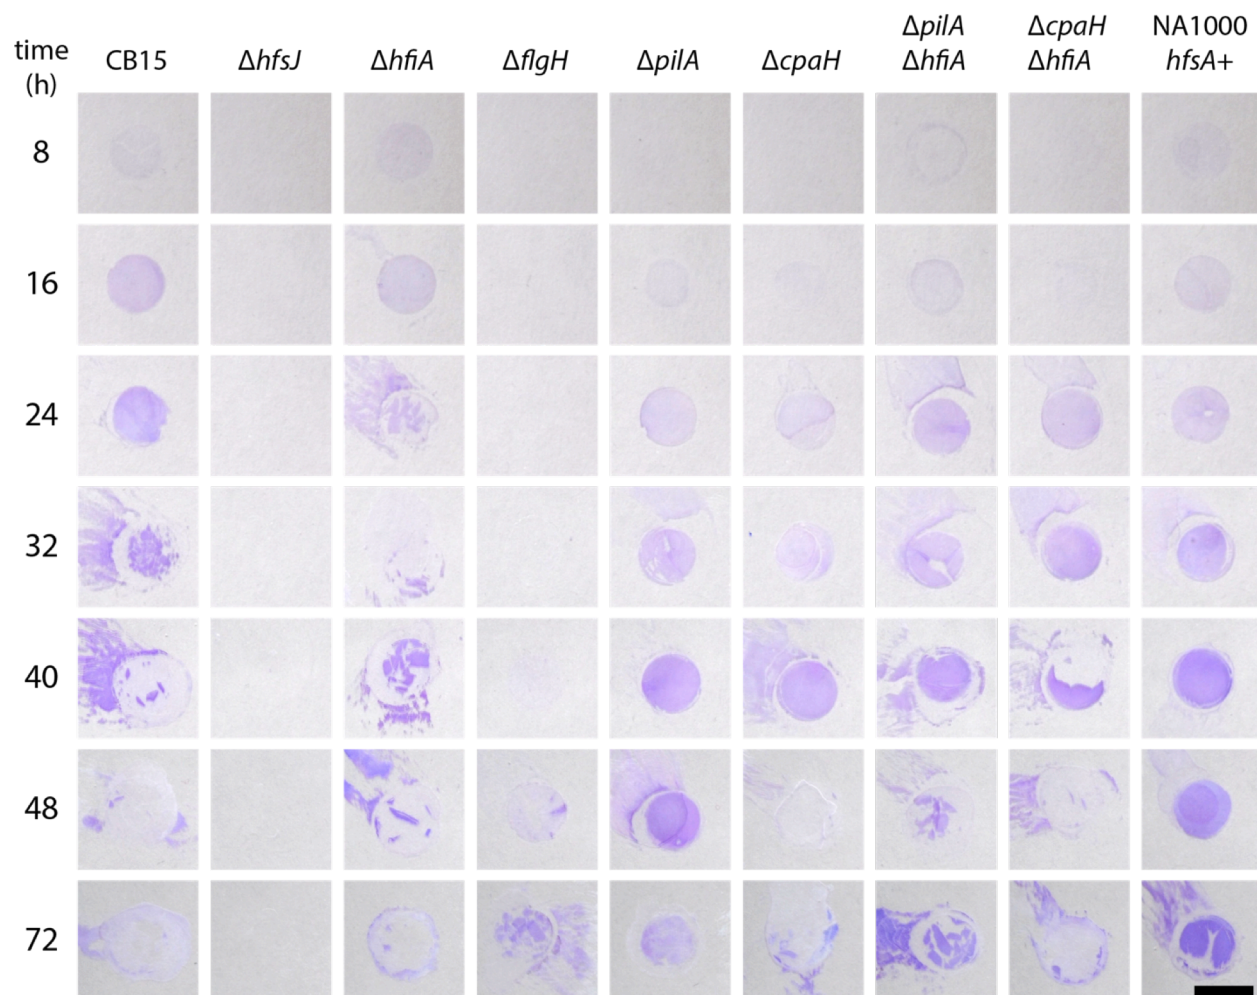

**Figure 6: Crystal violet staining of pellicle samples**

Pellicles of wild-type and mutant strains sampled throughout development and evaluated by crystal violet staining. Note three stages of pellicle development (CB15 times indicated): adhesive monolayer (up to 24 hours), crumbly transition phase (32-40 hours), and non-adhesive film (48+ hours). Pellicles sampled are from the same experiment presented in Figures 7 and 8. This experiment was repeated two additional times. Scale bar is 1 cm.



## Determinants of *Caulobacter* pellicle development

eventually emerged from this strain did not homogeneously cover the air-liquid interface, but rather contained microcolony-like aggregates that eventually became visible by eye (Figure 5).  $\Delta flgH$  cells sampled at the air-liquid interface were primarily stalked or pre-divisional. At early time points, patches of cells attached to the coverslip, and small rosettes of 3-10 of cells were abundant. Small rosettes were rarely observed in the surface samples from other strains. Larger rosettes and

aggregates were also evident in  $\Delta flgH$  pellicles (Figure 8). With time, microcolonies consisting of dense mats of large rosettes became visible by eye (Figures 5 and 8), and when these large surface colonies were placed between a slide and a coverslip, clusters of rosettes became detached from the sample (Figure 8, see 40 hr sample). Eventually, the surface of the culture medium became covered with a film that did not adhere efficiently to glass and fragmented into large pieces (Figure 5, 72 hours). Though

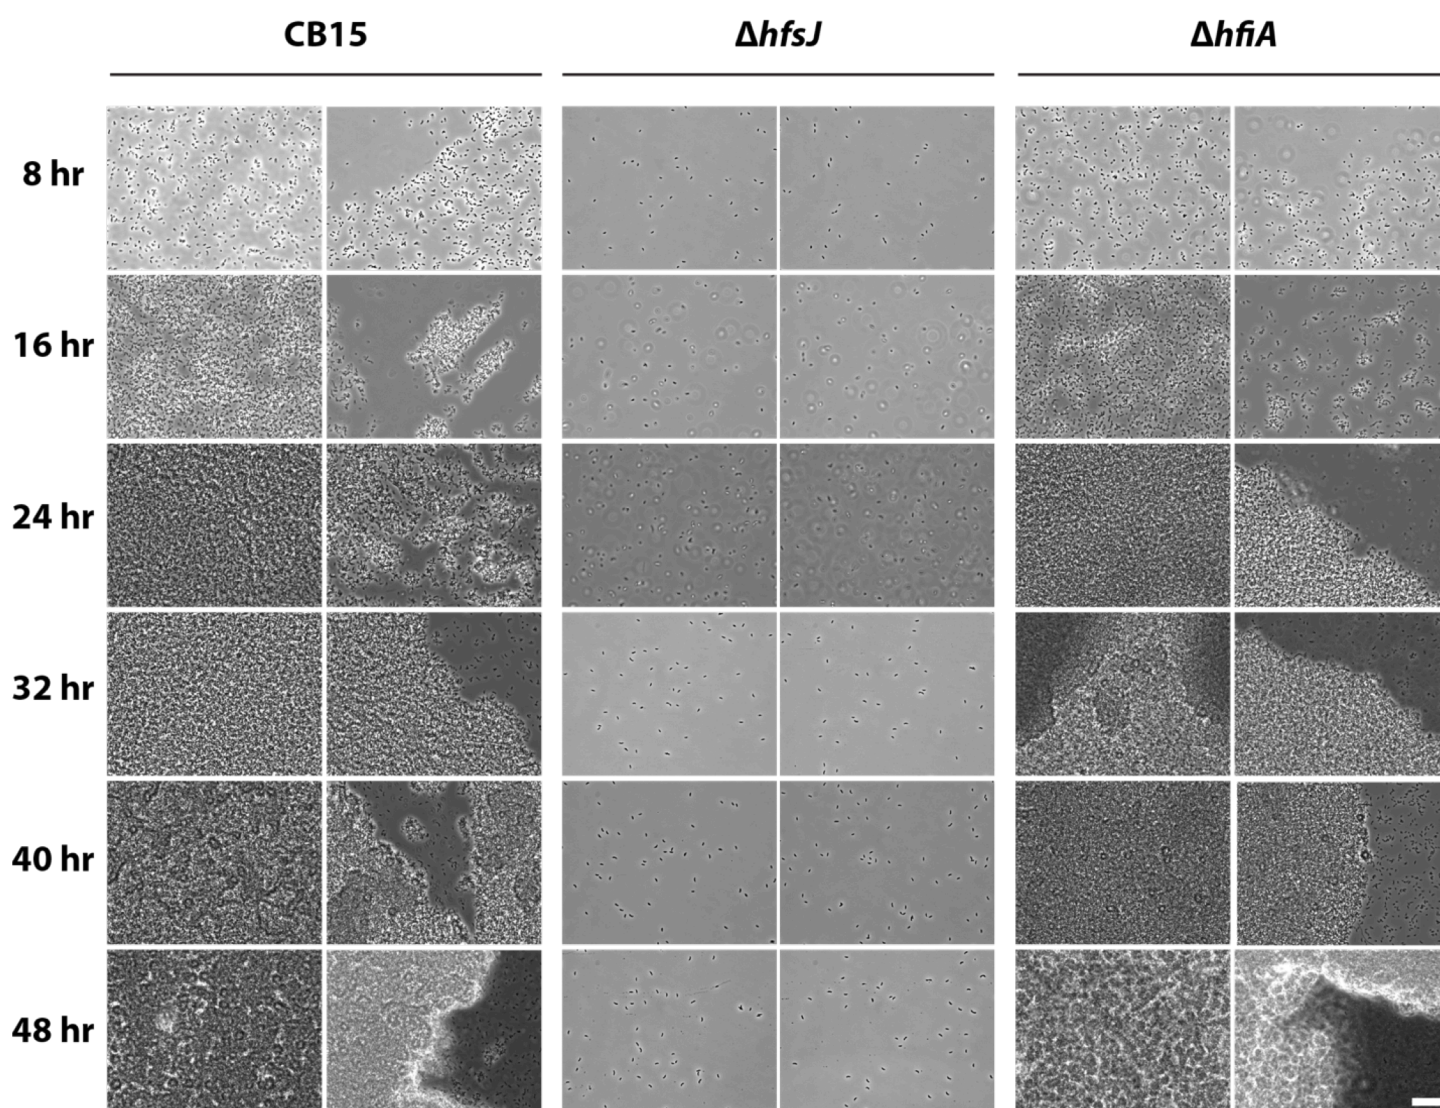

**Figure 7: *C. crescentus* mutants lacking holdfast fail to accumulate at the air-liquid interface**

Micrographs of pellicle samples from wild-type (CB15) and mutant strains as in Figure 2 sampled at 8-hour intervals. Cells in which the holdfast synthesis gene *hfsJ* is deleted ( $\Delta hfsJ$ ) fail to accumulate at the air-liquid interface. Cells lacking the holdfast inhibitor gene *hfiA* ( $\Delta hfiA$ ) have accelerated pellicle development. Scale bar is 20  $\mu$ m. Representative images from one of three independent experiments are shown.



## Determinants of *Caulobacter* pellicle development

the non-motile  $\Delta flgH$  strain was unable to actively move to the air-liquid interface, the hyper-holdfast phenotype of this strain (31, 42) seemed to enable capture of cells that arrived at the surface by chance. This resulted in cell accumulation and formation of the observed microcolonies at this boundary. I postulate that the inability of  $\Delta flgH$  daughter cells to disperse, combined with premature holdfast development in this strain (42) promotes microcolony formation rather than an even

distribution of cells at the air-liquid interface. These data support a model in which flagellar motility enables cells to efficiently reach the air-liquid interface, but that motility *per se* is not required for cells to colonize this microenvironment.

Both  $\Delta pilA$  and  $\Delta cpaH$  strains were defective in pellicle development. These pilus mutants are motile and capable of synthesizing holdfast and both accumulated at the air-liquid interface as monolayers similar to wild type

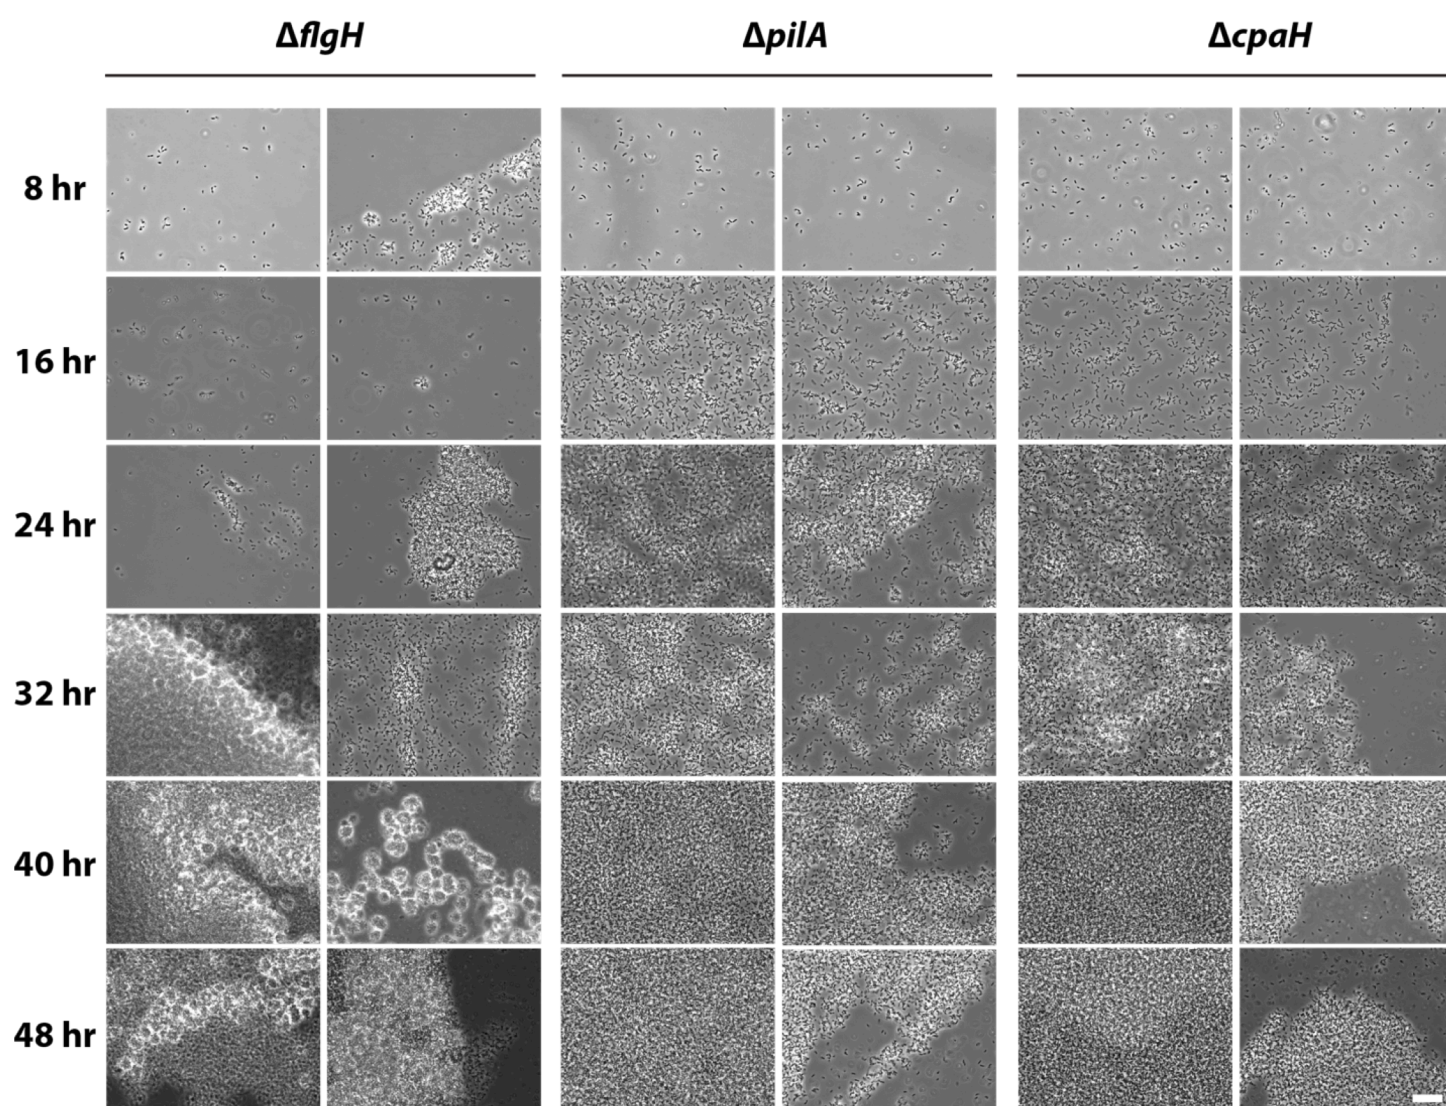

**Figure 8: Flagellum and pilus mutants have defects in pellicle development**

Micrographs of mutant strains defective in flagellar assembly ( $\Delta flgH$ ), pilus assembly ( $\Delta cpaH$ ) or lacking the pilus filament gene ( $\Delta pilA$ ) imaged as in Figure 7. Representative images are from the same experiment presented in Figure 7 to enable direct comparisons between strains.

## Determinants of *Caulobacter* pellicle development

(Figures 7 and 8). However, the density of these monolayers increased more slowly than wild type. In addition, surface plugs from these mutant films retained the capacity to adhere to glass for a longer period (Figure 6), and resisted scaring upon plug removal for an extended period of sampling. These observations are consistent with an extended monolayer phase. Even when dense monolayers formed, both mutants were defective in transitioning to a multilayered structure as evidenced by microscopic images and crystal violet stains of surface plugs (Figures 6 & 8).

It is notable that in a selection for mutants with surface attachment defects, these two mutants displayed distinct phenotypes;  $\Delta pilA$  mutants had reduced surface attachment, while  $\Delta cpaH$  mutants displayed enhanced surface attachment owing to increased holdfast synthesis (31). Thus in the context of attachment to solid surfaces, increased holdfast synthesis can outweigh defects from the loss of pili. In pellicle development on the other hand, the defects in these two classes of pilus mutants were nearly the same. The primary difference was that the  $\Delta cpaH$  mutant transitioned to a non-adherent, crumbly film sooner than the  $\Delta pilA$  mutant, as might be expected for a strain with elevated holdfast synthesis (Figure 6). Even though  $\Delta cpaH$  transitioned to a dense, stiffer structure sooner than  $\Delta pilA$ , this mutant was still significantly delayed compared to wild type. In addition, micro-colonies were often observed in  $\Delta cpaH$  surface films, but were smaller and less pronounced than in the  $\Delta flgH$  surface films (Figure 5).

Finally, I examined pellicle development in  $\Delta pilA$  and  $\Delta cpaH$  mutants that also carried an in-frame deletion of *hfiA* in order to test whether elevated holdfast production could overcome the defects associated with the loss

of pili. The  $\Delta pilA\Delta hfiA$  and  $\Delta cpaH\Delta hfiA$  double mutant strains did transition to a crumbly non-adherent film sooner than their  $\Delta pilA$  and  $\Delta cpaH$  counterparts. However, both double mutant strains were still delayed compared to the  $\Delta hfiA$  single mutant and were not restored to wild-type pellicle development (Figure 6). Together, these data indicate that pili are not required for *C. crescentus* to colonize the air liquid interface, but these appendages do contribute to formation of a dense robust pellicle. Moreover, these data indicate that elevated holdfast production promotes pellicle development, but is not sufficient to fully compensate for the loss of pili.

### *C. crescentus* NA1000 pellicles are qualitatively distinct from CB15

NA1000 is a standard laboratory strain that is almost completely isogenic with CB15 (43), and that is used to produce synchronized populations of *C. crescentus* for cell cycle studies (44). The synthesis of an extracellular polysaccharide (EPS) on the surface of stalked cells, but not newborn swarmer cells, enables isolation of NA1000 swarmer cells by centrifugation through a percoll gradient (45). Genes required for the synthesis of this cell-cycle regulated EPS are encoded by a mobile genetic element that is present in the NA1000 genome, but missing from CB15 (43). In addition, NA1000 is defective in holdfast formation owing to a frame-shift mutation in *hfsA* (43).

NA1000 did not develop pellicles under static growth conditions. Restoration of *hfsA* to a functional (non-frameshifted) allele was sufficient to enable pellicle formation in this background (Figure 9a). However, NA1000 pellicles are less cohesive than those formed by strain CB15. When visualized by light



## Determinants of *Caulobacter* pellicle development

microscopy, I observed more space between cells even in the center of the film, and the mounted pellicle plugs appeared to be more fluid. In addition, rosettes are less tightly packed and more interwoven (Figure 9b). In

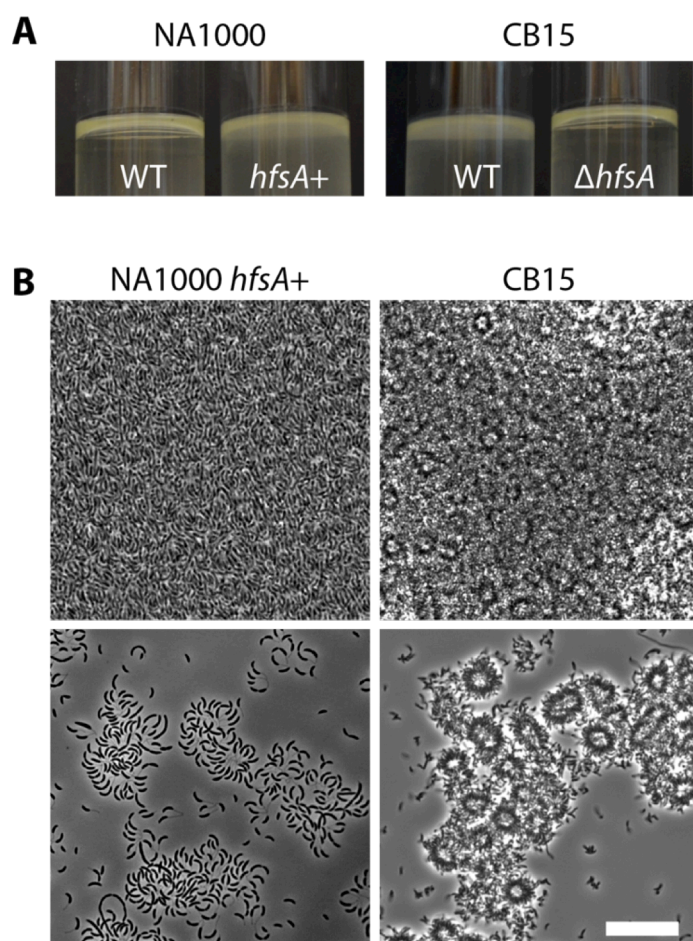

**Figure 9: Pellicle structure of NA1000 strains is qualitatively different from CB15.**

**A.** Pellicles of cultures grown statically for 3 days are pictured. *C. crescentus* NA1000 strains (wild-type-WT and *hfsA* restored) are on the left and *C. crescentus* CB15 strains (wild-type and  $\Delta hfsA$ ) are on the right. The wild-type NA1000 strain harbors a frameshift mutation in *hfsA*, and does not make holdfast or develop pellicles. Reversion of this gene to the functional allele (*hfsA*+) results in pellicle development. CB15 strains are shown for comparison. Deletion of *hfsA* abolishes pellicle development. **B.** Phase contrast micrographs of pellicle samples from NA1000 *hfsA* and wild-type CB15 cultures collected 40 hours after inoculation. Images are of the center of the plug (top) and rosettes disrupted from the film (bottom). Scale bar is 20  $\mu$ m.

short, even though restoration of the *hfsA* frameshift in NA1000 restores holdfast development and pellicle formation, there are qualitative differences between NA1000 and CB15 pellicles that are likely a result of differences in EPS biosynthesis or other known genetic differences between these strains (43). These strain differences should be considered as investigators look toward future studies of *C. crescentus* biofilm development and attachment behavior.

## Discussion

### *An alphaproteobacterial model for biofilm development at the air-liquid boundary*

Molecular factors that contribute to colonization of solid surfaces in both environmental and host-microbe contexts are well understood for many bacterial species. While biofilms at the air-liquid boundary have been studied, they have received less attention and our understanding of the molecular determinants of biofilm development at such interfaces is less well developed. Data presented in this study define distinct stages of pellicle development in *C. crescentus*, a model *Alphaproteobacterium*. The *C. crescentus* pellicle does not initiate at the solid edges of the air-liquid interface, but rather develops uniformly across the entire surface. Initially, individual cells accumulate at this boundary as a homogeneous monolayer of unconnected cells. When the monolayer becomes sufficiently dense, rosettes accumulate beneath monolayer and eventually form a multilayered pellicle structure comprised largely of dense rosettes (Figure 2). These stages are reminiscent of biofilm development on solid substrates, in which surfaces are often initially colonized with a monolayer of cells before more complex three-

## Determinants of *Caulobacter* pellicle development

dimensional structures form. I propose that *C. crescentus* colonization and pellicle formation at the air-liquid boundary is an experimentally tractable model for the study of biofilm development in an *Alphaproteobacterium*.

While it is known that bacteria will form monolayers at air-liquid interfaces in natural settings, the ecological relevance of the three-dimensional structure I observe in later stages of *C. crescentus* pellicle development is not clear. Poindexter observed individual prosthecae cells, but not rosettes in environmental samples; rosettes were only evident in her pure cultures (20). Similarly, in surface samples collected directly from a freshwater pond, Fuerst describes prosthecae cells; rosettes or films were not noted in this study (46). I am not aware of any descriptions of *Caulobacter*, or other rosette-forming *Alphaproteobacteria* producing rosettes outside of the laboratory. I posit that rosettes and three-dimensional *Caulobacter* pellicles/films would only occur in environments with sufficient nutrients to support high cell densities.

### *Multiple polar appendages contribute to pellicle development*

*C. crescentus* swarmer cells are born with a single flagellum and multiple pili that decorate the old cell pole, and are preloaded with the machinery to elaborate a holdfast at this same pole (20, 23, 24). Development of these surface appendages is intimately tied to the cell cycle and is central to the lifestyle and ecology of *Caulobacter* species. Specifically, the flagellum confers motility and enables swarmer cells to disperse, while the flagellum and the pili together contribute to reversible attachment during colonization of solid surfaces. When deployed, the holdfast confers irreversible attachment to solid surfaces (20, 23, 26, 32, 47).

In colonization of air-liquid interface, each of these appendages also play important roles. Cells lacking a functional flagellum are unable to efficiently reach the interface and, instead, arrive there only by chance. Cells unable to synthesize holdfast reach the liquid surface as motile swimmers, but do not remain after differentiation into a non-motile stalked cell. Thus, holdfast mutants do not form a dense pellicle film. Finally, cells lacking pili efficiently reach the air-liquid interface and accumulate to high densities, but exhibit developmental delays. A synthesis and discussion of published data on the *C. crescentus* flagellum, pili, and holdfast in the context of my results follow.

### FLAGELLUM

The requirement that *C. crescentus* be motile to efficiently reach the air-liquid interface (Figures 5 and 8) is not particularly surprising. Genes involved in aerotaxis and motility are known determinants of pellicle formation in other aerobes (eg. (16, 48-51). *C. crescentus* is capable of aerotaxis (52), though the requirement for aerotaxis *per se* in *C. crescentus* pellicle formation remains undefined as the sensors are unknown. While static *C. crescentus* cultures have a steep oxygen gradient at the air interface (Figure 1c), non-motile or non-adhesive *C. crescentus* mutants can still grow to high density in static culture. This is consistent with a tolerance of this species for microoxic conditions (53).

While motility is required for cells to efficiently reach the surface, I have shown that it is not explicitly required for accumulation at the surface.  $\Delta flgH$  mutants, which lack a flagellum, colonize the air-liquid interface, albeit inefficiently and in a less uniform manner than wild type (Figures 5 and 8). It is known that the loss of flagellar genes including *flgH* and *flgE*



## Determinants of *Caulobacter* pellicle development

results in a hyper-holdfast phenotype (31, 42). In the context of pellicle development, the observed microcolonies of rosettes in the  $\Delta flgH$  strain suggests that its hyper-holdfast phenotype can overcome the motility defect of this strain.

### HOLDFAST

Data presented in this study provide evidence that the holdfast can function to trap cells at the air-liquid interface. At the monolayer stage, nearly every *Caulobacter* cell at this interface has a holdfast (Figure 3). Moreover, inspection of bubble surfaces formed when mounting samples for microscopy reveals the long axis of cells positioned perpendicular to the bubble boundary with the holdfast pole occupying the air-liquid interface (Figure 1e). I infer that the holdfast allows polar attachment of replicative stalked cells to air-liquid interfaces, similar to solid surfaces. The observations reported here are reminiscent of an earlier report that the Alphaproteobacterium *Hyphomicrobium vulgaris* stands perpendicular to air-liquid, liquid-liquid and solid-liquid boundaries with the replicative pole at the interface (54).

How might the holdfast enable cells to remain at this interface, and what can be inferred about the nature of the holdfast material from these observations? The microlayer between the bulk liquid and the air represents a unique physiochemical environment. Hydrophobic and amphipathic molecules partition to this boundary (1, 2, 7, 10). Surface hydrophobicity is an important feature of bacteria that colonize the air-liquid interface (55). Though the exact chemical nature of the holdfast is not known, the fact that it apparently partitions to this zone implies that it has hydrophobic, or at least amphipathic

properties. A similar conclusion was reached regarding the unipolar polysaccharides secreted by the *H. vulgaris* and the unrelated *Sphingobacterium Flexibacter aurantiacus* (54).

The air-liquid interface of complex aqueous media is more viscous than the bulk solution owing to polymers adsorbed at this surface (7, 8, 15, 56). Increased surface viscosity is responsible for trapping motile swarmer cells at the air-liquid interface (56) and may also trap the holdfast, which itself is secreted as an amorphous viscous liquid (57). In sum, the holdfast can apparently function to partition non-motile replicative cells to the air-liquid interface. This function is likely important for an aerobe that is only motile (and aerotactic) in the non-replicative swarmer phase of its life cycle.

How then do rosettes, in which the holdfast is buried in the interior of a cluster of cells, partition to the air-liquid boundary? The answer to this question is not clear from the data presented in this manuscript. One possibility is that the holdfast polymer excludes water from the core of rosettes to an extent that it reduces the density of the collective aggregate. More extensive biophysical characterization of rosettes will lead to a better understanding of the role of these structures in partitioning to the air-liquid interface and in subsequent pellicle development.

### PILUS

Type IV pili are not required for cells to reach or adsorb to the air-liquid interface (Figure 8). However, cells lacking pili inefficiently reach high densities at the interface and are extremely delayed in the transition to a multilayered pellicle structure, even when holdfast production is elevated. I envision two non-exclusive explanations for this result: a) pili are important factors mediating cell-cell

## Determinants of *Caulobacter* pellicle development

interactions and facilitate the coalescence of cells during rosette formation; b) pili constitute a matrix component that confers strength and rigidity to the pellicle. Pili can extend up to 4  $\mu$ m in length (58) and physically retract (41). Pilus interactions between neighboring cells should increase load during pilus retraction, thereby stimulating holdfast production (41) while simultaneously bringing holdfast bearing cell poles in closer proximity. In this way pili may organize cells and promote rosette development. This model is similar to *Neisseria gonorrhoeae*, where pilus interactions and pilus motor activity promote dense packing of cells (59-61). Electron micrographs of rosettes of the closely related species, *Asticcacaulis biprosthecum*, reveal a network of pili surrounded by holdfast at the junction between poles (62). These snapshots lead one to speculate that pilus retraction brought these cell poles together. In addition, the *A. biprosthecum* micrographs, combined with the results described here, inform the hypothesis that pili confer structural support to reinforce holdfast-mediated interactions between cells.

Although difficult to capture by standard light microscopy, I observed that assemblies of cells were less organized at the air-liquid interface in both pilus null strains ( $\Delta pilA$  and  $\Delta cpaH$ ). In these mutants, it was often difficult to assess whether cells were arranged in a rosette (i.e. attached at the distal end of the stalked poles) or simply in an unordered clump of non-specifically adherent cells. This qualitative conclusion held true in analyses of pellicle plugs where I blinded the strain genotype. My observations support a role for the pilus in organizing and promoting cell-cell interactions. In many species, type IV pili mediate motility, however in *Caulobacter* the primary role of these appendages seems to be

attachment to surfaces (26, 41, 63, 64). As an extension, I propose that *C. crescentus* pili facilitate cell-cell attachments in the context of the pellicle. The role of type IV pili in cell-cell interactions and robust pellicle formation merits further study.

Finally, I note that the role of pili in mediating attachment is context dependent. In a pellicle, mutants lacking the pilus filament ( $\Delta pilA$ ) or a component of the pilus assembly machine ( $\Delta cpaH$ ) exhibit similar phenotypes. In the context of attachment to cheesecloth or polystyrene,  $\Delta pilA$  has attenuated surface attachment while a  $\Delta cpaH$  strain exhibits hyper-attachment (31). In shaken broth, deletion of *cpaH* increases the fraction of cells with a holdfast while deletion of *pilA* does not affect the probability of holdfast development (31). On an agarose pad, cells lacking *pilA* exhibit delayed holdfast development (42). Collectively, these results indicate that physical/environmental constraints likely influence the relative importance of the pilus function *per se* and pilus regulation of holdfast development on attachment.

### *On the formation of strings of cells and the threads that connect them*

Fluorescence imaging of intact pellicles suggest the presence of a thread-like structure that does not stain with fWGA, but upon which holdfast-bearing cells can attach (Figures 3 and 4). This thread-like material seems to connect strings of adjacent rosette cores as well as looser assemblies of cells. What, then, is this thread to which holdfasts adhere that apparently mediates longer-range interactions in a pellicle? The length of the connections suggests a polymeric molecule (polysaccharide, DNA or a protein fiber). This material does not bind WGA, suggesting it is not holdfast

## Determinants of *Caulobacter* pellicle development

polysaccharide, unless the cell produces a modified form lacking N-acetylglucosamine. In the pellicle context, *C. crescentus* may synthesize a previously uncharacterized extracellular polysaccharide. For example, *Agrobacterium* elaborates a polar adhesin and also synthesizes extracellular cellulose fibrils that aid in cell aggregations and attachment to plant cells (65, 66). It is also possible that these threads are DNA. This molecule is a well-established component of the biofilm matrix of other bacteria (17). DNA associates with the outer layers of the *C. crescentus* holdfast and similarly is observed adjacent to the holdfast polysaccharide in rosette cores (33). In other work, DNA released during cell death was demonstrated to bind to holdfast and inhibit attachment (67). This suggests a model in which DNA associates with the holdfast polysaccharide and at sufficiently high concentrations masks the adhesin, similar to high concentrations of WGA (32). Finally, polymers of proteins such as pili or flagella could conceivably facilitate long-range interactions. Pili are observed in rosettes of *Asticcacaulis* (62) and cells lacking PilA are defective in development of a multicellular structure. However, this filament is typically retracted into the cell and single pilus filaments are too short to facilitate interactions of the length scale I observe. Flagellar polymers on the other hand are shed into the medium (68), though they are occasionally observed still attached at the end of a stalk extension (20). It may be the case the overlapped mixtures of these filamentous materials produce these threads. Future work is necessary to identify this component of the *Caulobacter* pellicle biofilm.

### *The distribution and ecological importance of the holdfast in Alphaproteobacteria*

Synthesis of a holdfast-like adhesin at one cell pole is a broadly conserved trait in *Alphaproteobacteria*. Examples of species that secrete polar adhesins or form polar rosette aggregates have been described in almost every *Alphaproteobacterial* order including *Rhizobiales* (69-78), *Caulobacterales* (20, 32, 62, 79-81), *Rhodobacterales* (82-87), and *Sphingomonadales* (88-90). Exceptions are *Rhodospirillales* and *Rickettsiales*, which are at the base of the *Alphaproteobacterial* tree (91). The ensemble of holdfast synthesis genes (29, 30, 69, 76, 79, 85, 92), and chemical composition of the holdfast polysaccharides (32) vary between species and families, which may reflect chemical differences in the niches particular species colonize.

For many *Alphaproteobacteria*, the advantage of a polar adhesin for attachment to surfaces is obvious: *Agrobacterium* and *Rhizobium* adhere to plant roots during symbiosis, *Roseobacter* interact with algae in a symbiosis, and to submerged abiotic surfaces that are coated by conditioning films. I propose that attachment/partitioning to air-liquid interfaces is a general function of holdfast-like polar polysaccharides in some species. For example, *Phaeobacter* strain 27-4 and other *Roseobacter* spp. form interlocking rosettes at the air liquid interface in static cultures (83, 84). In biofilm assays, *Agrobacterium* attaches most robustly at the air-solid-liquid interface and this attachment requires the polar adhesin (eg. (92)). For *Alphaproteobacteria* that are aerobic heterotrophs, the advantage of a cellular mechanism to take advantage of elevated nutrients and oxygen at the air-liquid interface is clear. The holdfast can provide this function.

## Determinants of *Caulobacter* pellicle development

### Materials and Methods

#### *Growth conditions*

The *C. crescentus* strains used in this study are derived from the CB15 wild-type parent unless noted; see Table 1. All strains were cultured in peptone-yeast extract (PYE) broth containing 0.2% peptone, 0.1% yeast extract, 1 mM MgSO<sub>4</sub>, 0.5 mM CaCl<sub>2</sub>. PYE was solidified with 1.5% agar for propagation of strains. Strains detailed in Table 1 were struck from -80°C glycerol stocks on to PYE agar and grown at 30°C or room temperature (20-23°C) until colonies appeared after 2-3 days. For static growth experiments, starter cultures (2-10 ml) were inoculated from colonies and grown with aeration overnight at 30°C. Starter cultures were diluted to an optical density at 660 nm (OD<sub>660</sub>) of approximately 0.005 and grown without shaking on the benchtop at room temperature (20-23°C). For experiments requiring repeated sampling through time, I grew cultures with larger surface areas to avoid resampling from the same position. In such experiments, 400 ml of culture was grown in 600 ml Pyrex beakers (9 cm diameter) covered in foil to prevent contamination. In experiments involving only macroscopic inspection of pellicle development, static cultures were inoculated at a similar starting density and grown in test tubes.

#### *Sampling from the surface*

To capture minimally disturbed cells from the air-liquid interface, I placed the large end of a 1 ml pipet tip on the surface of the static culture. Lifting the tip removed the corresponding segment of the surface layer as a plug (see Figure 1). I placed the end of the tip carrying the plug sample on a glass slide. I gently applied air pressure to the opposite small end

of the tip as I lifted the tip from the slide to ensure complete sample transfer.

#### *Microscopy*

Surface layer plugs placed on glass slides were covered with glass coverslips and imaged using phase contrast or differential interference contrast with a HCX PL APO 63×/1.4na Ph3 objective on a Leica DM5000 upright microscope. Images were captured with a Hamamatsu Orca-ER digital camera using Leica Application Suite X software.

#### *Crystal violet staining of pellicle plugs*

Surface plugs were placed on glass slides and allowed to stand for 2-4 minutes. After rinsing slides under flowing tap water, the slide was covered with a 0.01% crystal violet solution in water (approximately 1-2 ml to cover the slide). After 3-5 minutes of incubation, the slide was rinsed again and allowed to dry. Stained plugs were photographed with a Nikon 35mm digital camera.

#### *Fluorescent staining of holdfast*

For staining of the holdfast *in situ*, cultures were supplemented with fluorescent Wheat Germ Agglutinin conjugated to Alexa Fluor™ 594 (Thermo Fisher) (fWGA) at the time of inoculation. I grew static cultures in the presence of 10, 1 or 0.2 ug/ml fWGA. The highest concentration of fWGA delayed pellicle development. Pellicles with 1 or 0.2 ug/ml fWGA developed similar to paired cultures without fWGA. I used 1 ug/ml of fWGA for these experiments, as signal was more intense than with 0.2 ug/ml. These static cultures were grown under a cardboard box to minimize photobleaching. Samples were collected as above and imaged in phase and fluorescence imaging modes using Chroma filter set 41043.

## Determinants of *Caulobacter* pellicle development

### Oxygen profiling

Oxygen concentrations were measured with a Unisense Field MultiMeter 7614 equipped with a motor controlled micromanipulator and a Clark-type oxygen microelectrode (OX-25; 20-30  $\mu\text{m}$  probe diameter; Unisense). Two point calibrations were performed with air-saturated  $\text{diH}_2\text{O}$  ( $[\text{O}_2] \approx 283 \mu\text{M}$ ) and a solution of 0.1 M sodium hydroxide, 0.1 M sodium ascorbate (anoxic standard). Calibrations were checked throughout the experiments. Oxygen measurements were performed in 100  $\mu\text{m}$  steps downward starting at the top of the culture. The sensor limit of detection is 0.3  $\mu\text{M}$   $\text{O}_2$ . Profiles for two static cultures for each strain are presented. Measurements were made at the Marine Biological Laboratory (Woods Hole, MA) with equipment loaned to the Microbial Diversity course.

### Acknowledgements

I thank David Hershey and other members of the Crosson lab for helpful discussions and feedback. Sean Crosson additionally provided

valuable editorial feedback. The dissolved oxygen measurements were performed at the Marine Biological Laboratory (Woods Hole, MA) with equipment loaned to the Microbial Diversity course from Unisense. I thank Bingran Chen for her assistance in making these measurements. This work was supported by a grant from the National Institutes of Health (R01GM087353).

**Table 1: Strains used in this work**

| Strain | Genotype                       | Source/reference |
|--------|--------------------------------|------------------|
| FC19   | CB15                           | (20, 93)         |
| FC20   | NA1000                         | (43)             |
| FC1974 | CB15 $\Delta hfsJ$             | (36)             |
| FC1356 | CB15 $\Delta hfiA$             | (36)             |
| FC1266 | CB15 $\Delta flgH$             | (31)             |
| FC1265 | CB15 $\Delta pilA$             | (31)             |
| FC3013 | CB15 $\Delta cpaH$             | (31)             |
| FC3084 | CB15 $\Delta pilA \Delta hfiA$ | (31)             |
| FC3083 | CB15 $\Delta cpaH \Delta hfiA$ | (31)             |
| FC767  | CB15 $\Delta hfsA$             | (43)             |
| FC764  | NA1000 $hfsA^+$                | (43)             |

### Literature cited

1. **Davies JT, Rideal EK.** 1963. Interfacial phenomena, 2nd ed. Academic Press, London.
2. **Van Oss CJ.** 2006. Interfacial forces in aqueous media, p 438 p., 2nd ed. Taylor & Francis, Boca Raton, Fla.
3. **Marshall KC.** 1996. Adhesion as a strategy for access to nutrients, p 59-87. In Fletcher M (ed), Bacterial Adhesion: Molecular and Ecological Diversity. Wiley-Liss, Inc., New York.
4. **Henrici AT.** 1933. Studies of Freshwater Bacteria: I. A Direct Microscopic Technique. J Bacteriol **25**:277-287.
5. **Zobell CE, Allen EC.** 1935. The Significance of Marine Bacteria in the Fouling of Submerged Surfaces. J Bacteriol **29**:239-251.
6. **Naumann E.** 1917. Beiträge zur kenntnis des teichnanoplanktons. II. Über das neuston des süßwasser. . Biol Zentbl **37**:98-106.
7. **Cunliffe M, Engel A, Frka S, Gasparovic B, Guitart C, Murrell JC, Salter M, Stolle C, Upstill-Goddard R, Wurl O.** 2013. Sea surface microlayers: A unified physicochemical and biological perspective of the air-ocean interface. Progress in Oceanography **109**:104-116.
8. **Cunliffe M, Upstill-Goddard RC, Murrell JC.** 2011. Microbiology of aquatic surface microlayers. FEMS Microbiol Rev **35**:233-246.
9. **Wotton RS, Preston TM.** 2005. Surface films: Areas of water bodies that are often overlooked. Bioscience **55**:137-145.
10. **Kjelleberg S.** 1985. Mechanisms of Bacterial Adhesion at Gas-Liquid Interfaces, p 163-194. In



## Determinants of *Caulobacter* pellicle development

- Fletcher M, Savage DC (ed), Bacterial adhesion: mechanisms and physiological significance. Plenum Press, New York.
11. **Mills AL, Powelson DK.** 1996. Bacterial interactions with surfaces in soils, p 25-57. In Fletcher M (ed), Bacterial Adhesion: Molecular and Ecological Diversity. Wiley-Liss, Inc., New York.
  12. **Berne C, Ellison CK, Ducret A, Brun YV.** 2018. Bacterial adhesion at the single-cell level. *Nat Rev Microbiol* **16**:616-627.
  13. **Davey ME, O'Toole G A.** 2000. Microbial biofilms: from ecology to molecular genetics. *Microbiol Mol Biol Rev* **64**:847-867.
  14. **Flemming HC, Wingender J, Szewzyk U, Steinberg P, Rice SA, Kjelleberg S.** 2016. Biofilms: an emergent form of bacterial life. *Nat Rev Microbiol* **14**:563-575.
  15. **Vaccari L, Molaei M, Niepa THR, Lee D, Leheny RL, Stebe KJ.** 2017. Films of bacteria at interfaces. *Adv Colloid Interface Sci* **247**:561-572.
  16. **Armitano J, Mejean V, Jourlin-Castelli C.** 2014. Gram-negative bacteria can also form pellicles. *Environ Microbiol Rep* **6**:534-544.
  17. **Okshevsky M, Meyer RL.** 2015. The role of extracellular DNA in the establishment, maintenance and perpetuation of bacterial biofilms. *Crit Rev Microbiol* **41**:341-352.
  18. **Wilhelm RC.** 2018. Following the terrestrial tracks of *Caulobacter* - redefining the ecology of a reputed aquatic oligotroph. *ISME J* **12**:3025-3037.
  19. **Poindexter JS.** 1981. The caulobacters: ubiquitous unusual bacteria. *Microbiol Rev* **45**:123-179.
  20. **Poindexter JS.** 1964. Biological Properties and Classification of the *Caulobacter* Group. *Bacteriol Rev* **28**:231-295.
  21. **Stove JL, Stanier RY.** 1962. Cellular Differentiation in Stalked Bacteria. *Nature* **196**:1189.
  22. **Poindexter JS.** 2006. Dimorphic Prosthe-cate Bacteria: The Genera *Caulobacter*, *Asticcacaulis*, *Hyphomicrobium*, *Pedomicro-bium*, *Hyphomonas* and *Thiodendron*., p 72-90. In Dworkin M, Falkow S, Rosenberg E, Schleifer KH, Stackebrandt E (ed), *The Prokaryotes*. Springer, New York, NY.
  23. **Bodenmiller D, Toh E, Brun YV.** 2004. Development of surface adhesion in *Caulobacter crescentus*. *J Bacteriol* **186**:1438-1447.
  24. **Levi A, Jenal U.** 2006. Holdfast formation in motile swarmer cells optimizes surface attachment during *Caulobacter crescentus* development. *J Bacteriol* **188**:5315-5318.
  25. **Li G, Brown PJ, Tang JX, Xu J, Quardokus EM, Fuqua C, Brun YV.** 2012. Surface contact stimulates the just-in-time deployment of bacterial adhesins. *Mol Microbiol* **83**:41-51.
  26. **Entcheva-Dimitrov P, Spormann AM.** 2004. Dynamics and control of biofilms of the oligotrophic bacterium *Caulobacter crescentus*. *J Bacteriol* **186**:8254-8266.
  27. **Bowers LE, Weaver RH, Grula EA, Edwards OF.** 1954. Studies on a strain of *Caulobacter* from water. I. Isolation and identification as *Caulobacter vibrioides* Henrici and Johnson with emended description. *J Bacteriol* **68**:194-200.
  28. **Henrici AT, Johnson DE.** 1935. Studies of Freshwater Bacteria: II. Stalked Bacteria, a New Order of Schizomycetes. *J Bacteriol* **30**:61-93.
  29. **Smith CS, Hinz A, Bodenmiller D, Larson DE, Brun YV.** 2003. Identification of genes required for synthesis of the adhesive holdfast in *Caulobacter crescentus*. *J Bacteriol* **185**:1432-1442.
  30. **Toh E, Kurtz HD, Jr., Brun YV.** 2008. Characterization of the *Caulobacter crescentus* holdfast polysaccharide biosynthesis pathway reveals significant redundancy in the initiating glycosyltransferase and polymerase steps. *J Bacteriol* **190**:7219-7231.
  31. **Hershey DM, Fiebig A, Crosson S.** 2019. A genome-wide analysis of adhesion in *Caulobacter crescentus* identifies new regulatory and biosynthetic components for holdfast assembly. *mBio* **in press**.
  32. **Merker RI, Smit J.** 1988. Characterization of the adhesive holdfast of marine and freshwater caulobacters. *Appl Environ Microbiol* **54**:2078-2085.
  33. **Hernando-Perez M, Setayeshgar S, Hou Y, Temam R, Brun YV, Dragnea B, Berne C.** 2018. Layered Structure and Complex Mechanochemistry Underlie Strength and Versatility in a Bacterial Adhesive. *MBio* **9**.
  34. **Pamp SJ, Sternberg C, Tolker-Nielsen T.** 2009. Insight into the microbial multicellular lifestyle via flow-cell technology and confocal microscopy. *Cytometry A* **75**:90-103.
  35. **O'Toole GA, Pratt LA, Watnick PI, Newman DK, Weaver VB, Kolter R.** 1999. Genetic approaches to study of biofilms. *Methods Enzymol* **310**:91-109.
  36. **Fiebig A, Herrou J, Fumeaux C, Radhakrishnan SK, Viollier PH, Crosson S.** 2014. A cell cycle and

## Determinants of *Caulobacter* pellicle development

- nutritional checkpoint controlling bacterial surface adhesion. *PLoS Genet* **10**:e1004101.
37. **Giltner CL, Nguyen Y, Burrows LL.** 2012. Type IV pilin proteins: versatile molecular modules. *Microbiol Mol Biol Rev* **76**:740-772.
38. **Chaban B, Hughes HV, Beeby M.** 2015. The flagellum in bacterial pathogens: For motility and a whole lot more. *Semin Cell Dev Biol* **46**:91-103.
39. **Yildiz FH, Visick KL.** 2009. *Vibrio* biofilms: so much the same yet so different. *Trends Microbiol* **17**:109-118.
40. **Hug I, Deshpande S, Sprecher KS, Pfohl T, Jenal U.** 2017. Second messenger-mediated tactile response by a bacterial rotary motor. *Science* **358**:531-534.
41. **Ellison CK, Kan J, Dillard RS, Kysela DT, Ducret A, Berne C, Hampton CM, Ke Z, Wright ER, Biais N, Dalia AB, Brun YV.** 2017. Obstruction of pilus retraction stimulates bacterial surface sensing. *Science* **358**:535-538.
42. **Berne C, Ellison CK, Agarwal R, Severin GB, Fiebig A, Morton RI, 3rd, Waters CM, Brun YV.** 2018. Feedback regulation of *Caulobacter crescentus* holdfast synthesis by flagellum assembly via the holdfast inhibitor HfiA. *Mol Microbiol* **110**:219-238.
43. **Marks ME, Castro-Rojas CM, Teiling C, Du L, Kapatral V, Walunas TL, Crosson S.** 2010. The genetic basis of laboratory adaptation in *Caulobacter crescentus*. *J Bacteriol* **192**:3678-3688.
44. **Schrader JM, Shapiro L.** 2015. Synchronization of *Caulobacter crescentus* for investigation of the bacterial cell cycle. *J Vis Exp* doi:10.3791/52633.
45. **Ardissone S, Fumeaux C, Berge M, Beaussart A, Theraulaz L, Radhakrishnan SK, Dufrene YF, Viollier PH.** 2014. Cell cycle constraints on capsulation and bacteriophage susceptibility. *Elife* **3**.
46. **Fuerst JA, Mcgregor A, Dickson MR.** 1987. Negative Staining of Fresh-Water Bacterioneuston Sampled Directly with Electron-Microscope Specimen Support Grids. *Microbial Ecology* **13**:219-228.
47. **Tsang PH, Li G, Brun YV, Freund LB, Tang JX.** 2006. Adhesion of single bacterial cells in the micronewton range. *Proc Natl Acad Sci U S A* **103**:5764-5768.
48. **Holscher T, Bartels B, Lin YC, Gallegos-Monterrosa R, Price-Whelan A, Kolter R, Dietrich LEP, Kovacs AT.** 2015. Motility, Chemotaxis and Aerotaxis Contribute to Competitiveness during Bacterial Pellicle Biofilm Development. *J Mol Biol* **427**:3695-3708.
49. **Armitano J, Mejean V, Jourlin-Castelli C.** 2013. Aerotaxis governs floating biofilm formation in *Shewanella oneidensis*. *Environ Microbiol* **15**:3108-3118.
50. **Yamamoto K, Arai H, Ishii M, Igarashi Y.** 2012. Involvement of flagella-driven motility and pili in *Pseudomonas aeruginosa* colonization at the air-liquid interface. *Microbes Environ* **27**:320-323.
51. **Giles SK, Stroehrer UH, Eijkelkamp BA, Brown MH.** 2015. Identification of genes essential for pellicle formation in *Acinetobacter baumannii*. *BMC Microbiol* **15**:116.
52. **Morse M, Colin R, Wilson LG, Tang JX.** 2016. The Aerotactic Response of *Caulobacter crescentus*. *Biophys J* **110**:2076-2084.
53. **Crosson S, McGrath PT, Stephens C, McAdams HH, Shapiro L.** 2005. Conserved modular design of an oxygen sensory/signaling network with species-specific output. *Proc Natl Acad Sci U S A* **102**:8018-8023.
54. **Marshall KC, Cruickshank RH.** 1973. Cell surface hydrophobicity and the orientation of certain bacteria at interfaces. *Arch Mikrobiol* **91**:29-40.
55. **Dahlback B, Hermansson M, Kjelleberg S, Norkrans B.** 1981. The hydrophobicity of bacteria - an important factor in their initial adhesion at the air-water interface. *Arch Microbiol* **128**:267-270.
56. **Morse M, Huang A, Li G, Maxey MR, Tang JX.** 2013. Molecular adsorption steers bacterial swimming at the air/water interface. *Biophys J* **105**:21-28.
57. **Li G, Brun YV, Tang JX.** 2013. Holdfast spreading and thickening during *Caulobacter crescentus* attachment to surfaces. *BMC Microbiol* **13**:139.
58. **Sommer JM, Newton A.** 1988. Sequential regulation of developmental events during polar morphogenesis in *Caulobacter crescentus*: assembly of pili on swarmer cells requires cell separation. *J Bacteriol* **170**:409-415.
59. **Welker A, Cronenberg T, Zollner R, Meel C, Siewering K, Bender N, Hennes M, Oldewurtel ER, Maier B.** 2018. Molecular Motors Govern Liquidlike Ordering and Fusion Dynamics of Bacterial Colonies. *Phys Rev Lett* **121**:118102.
60. **Taktikos J, Lin YT, Stark H, Biais N, Zaburdaev V.** 2015. Pili-Induced Clustering of *N. gonorrhoeae* Bacteria. *PLoS One* **10**:e0137661.
61. **Higashi DL, Lee SW, Snyder A, Weyand NJ, Bakke A, So M.** 2007. Dynamics of *Neisseria gonorrhoeae* attachment: microcolony development, cortical

## Determinants of *Caulobacter* pellicle development

- plaque formation, and cytoprotection. *Infect Immun* **75**:4743-4753.
62. **Umbreit TH, Pate JL.** 1978. Characterization of Holdfast Region of Wild-Type Cells and Holdfast Mutants of *Asticcacaulis-Biprosthecum*. *Archives of Microbiology* **118**:157-168.
63. **Maier B, Wong GCL.** 2015. How Bacteria Use Type IV Pili Machinery on Surfaces. *Trends Microbiol* **23**:775-788.
64. **Persat A, Stone HA, Gitai Z.** 2014. The curved shape of *Caulobacter crescentus* enhances surface colonization in flow. *Nat Commun* **5**:3824.
65. **Matthysse AG.** 1983. Role of bacterial cellulose fibrils in *Agrobacterium tumefaciens* infection. *J Bacteriol* **154**:906-915.
66. **Thompson MA, Onyeziri MC, Fuqua C.** 2018. Function and Regulation of *Agrobacterium tumefaciens* Cell Surface Structures that Promote Attachment. *Curr Top Microbiol Immunol* doi:10.1007/82\_2018\_96.
67. **Berne C, Kysela DT, Brun YV.** 2010. A bacterial extracellular DNA inhibits settling of motile progeny cells within a biofilm. *Mol Microbiol* **77**:815-829.
68. **Lagenaur C, Agabian N.** 1978. *Caulobacter* flagellar organelle: synthesis, compartmentation, and assembly. *J Bacteriol* **135**:1062-1069.
69. **Fritts RK, LaSarre B, Stoner AM, Posto AL, McKinlay JB.** 2017. A Rhizobiales-Specific Unipolar Polysaccharide Adhesin Contributes to *Rhodopseudomonas palustris* Biofilm Formation across Diverse Photoheterotrophic Conditions. *Appl Environ Microbiol* **83**.
70. **Williams M, Hoffman MD, Daniel JJ, Madren SM, Dhroso A, Korkin D, Givan SA, Jacobson SC, Brown PJ.** 2016. Short-Stalked Prosthecomicrobium *hirschii* Cells Have a *Caulobacter*-Like Cell Cycle. *J Bacteriol* **198**:1149-1159.
71. **Moore RL, Marshall KC.** 1981. Attachment and rosette formation by hyphomicrobia. *Appl Environ Microbiol* **42**:751-757.
72. **Laus MC, Logman TJ, Lamers GE, Van Brussel AA, Carlson RW, Kijne JW.** 2006. A novel polar surface polysaccharide from *Rhizobium leguminosarum* binds host plant lectin. *Mol Microbiol* **59**:1704-1713.
73. **Williams A, Wilkinson A, Krehenbrink M, Russo DM, Zorreguieta A, Downie JA.** 2008. Glucmannan-mediated attachment of *Rhizobium leguminosarum* to pea root hairs is required for competitive nodule infection. *J Bacteriol* **190**:4706-4715.
74. **Xie F, Williams A, Edwards A, Downie JA.** 2012. A plant arabinogalactan-like glycoprotein promotes a novel type of polar surface attachment by *Rhizobium leguminosarum*. *Mol Plant Microbe Interact* **25**:250-258.
75. **Tomlinson AD, Fuqua C.** 2009. Mechanisms and regulation of polar surface attachment in *Agrobacterium tumefaciens*. *Curr Opin Microbiol* **12**:708-714.
76. **Xu J, Kim J, Koestler BJ, Choi JH, Waters CM, Fuqua C.** 2013. Genetic analysis of *Agrobacterium tumefaciens* unipolar polysaccharide production reveals complex integrated control of the motile-to-sessile switch. *Mol Microbiol* **89**:929-948.
77. **Loh JT, Ho SC, de Feijter AW, Wang JL, Schindler M.** 1993. Carbohydrate binding activities of *Bradyrhizobium japonicum*: unipolar localization of the lectin BJ38 on the bacterial cell surface. *Proc Natl Acad Sci U S A* **90**:3033-3037.
78. **Schaper S, Krol E, Skotnicka D, Kaeffer V, Hilker R, Sogaard-Andersen L, Becker A.** 2016. Cyclic Di-GMP Regulates Multiple Cellular Functions in the Symbiotic Alphaproteobacterium *Sinorhizobium meliloti*. *J Bacteriol* **198**:521-535.
79. **Chertkov O, Brown PJ, Kysela DT, de Pedro MA, Lucas S, Copeland A, Lapidus A, Del Rio TG, Tice H, Bruce D, Goodwin L, Pitluck S, Detter JC, Han C, Larimer F, Chang YJ, Jeffries CD, Land M, Hauser L, Kyrpides NC, Ivanova N, Ovchinnikova G, Tindall BJ, Goker M, Klenk HP, Brun YV.** 2011. Complete genome sequence of *Hirschia baltica* type strain (IFAM 1418(T)). *Stand Genomic Sci* **5**:287-297.
80. **MacRae JD, Smit J.** 1991. Characterization of *caulobacters* isolated from wastewater treatment systems. *Appl Environ Microbiol* **57**:751-758.
81. **Curtis PD.** 2017. Stalk formation of *Brevundimonas* and how it compares to *Caulobacter crescentus*. *PLoS One* **12**:e0184063.
82. **Langille SE, Weiner RM.** 1998. Spatial and temporal deposition of hyphomonas strain VP-6 capsules involved in biofilm formation. *Appl Environ Microbiol* **64**:2906-2913.
83. **Bruhn JB, Gram L, Belas R.** 2007. Production of antibacterial compounds and biofilm formation by *Roseobacter* species are influenced by culture conditions. *Appl Environ Microbiol* **73**:442-450.

## Determinants of *Caulobacter* pellicle development

84. **Bruhn JB, Nielsen KF, Hjelm M, Hansen M, Bresciani J, Schulz S, Gram L.** 2005. Ecology, inhibitory activity, and morphogenesis of a marine antagonistic bacterium belonging to the Roseobacter clade. *Appl Environ Microbiol* **71**:7263-7270.
85. **Slightom RN, Buchan A.** 2009. Surface colonization by marine roseobacters: integrating genotype and phenotype. *Appl Environ Microbiol* **75**:6027-6037.
86. **Frank O, Michael V, Pauker O, Boedeker C, Jogler C, Rohde M, Petersen J.** 2015. Plasmid curing and the loss of grip--the 65-kb replicon of *Phaeobacter inhibens* DSM 17395 is required for biofilm formation, motility and the colonization of marine algae. *Syst Appl Microbiol* **38**:120-127.
87. **Segev E, Tellez A, Vlamakis H, Kolter R.** 2015. Morphological Heterogeneity and Attachment of *Phaeobacter inhibens*. *PLoS One* **10**:e0141300.
88. **Abraham WR, Estrela AB, Rohde M, Smit J, Vancanneyt M.** 2013. Prosthecate sphingomonads: proposal of *Sphingomonas canadensis* sp. nov. *Int J Syst Evol Microbiol* **63**:3214-3219.
89. **Min KR, Rickard AH.** 2009. Coaggregation by the freshwater bacterium *Sphingomonas natatoria* alters dual-species biofilm formation. *Appl Environ Microbiol* **75**:3987-3997.
90. **Yurkov V, Csotonyi JT.** 2009. New Light on Aerobic Anoxygenic Phototrophs, p 31-55. *In* Hunter CN, Daldal F, Thurnauer MC, Beatty JT (ed), *The Purple Phototrophic Bacteria* doi:10.1007/978-1-4020-8815-5\_3. Springer Netherlands, Dordrecht.
91. **Gupta RS, Mok A.** 2007. Phylogenomics and signature proteins for the alpha proteobacteria and its main groups. *BMC Microbiol* **7**:106.
92. **Xu J, Kim J, Danhorn T, Merritt PM, Fuqua C.** 2012. Phosphorus limitation increases attachment in *Agrobacterium tumefaciens* and reveals a conditional functional redundancy in adhesin biosynthesis. *Res Microbiol* **163**:674-684.
93. **Nierman WC, Feldblyum TV, Laub MT, Paulsen IT, Nelson KE, Eisen JA, Heidelberg JF, Alley MR, Ohta N, Maddock JR, Potocka I, Nelson WC, Newton A, Stephens C, Phadke ND, Ely B, DeBoy RT, Dodson RJ, Durkin AS, Gwinn ML, Haft DH, Kolonay JF, Smit J, Craven MB, Khouri H, Shetty J, Berry K, Utterback T, Tran K, Wolf A, Vamathevan J, Ermolaeva M, White O, Salzberg SL, Venter JC, Shapiro L, Fraser CM.** 2001. Complete genome sequence of *Caulobacter crescentus*. *Proc Natl Acad Sci U S A* **98**:4136-4141.
